# Supplementary material for: 高度不飽和脂肪酸と鶏肉とのおいしさの関連性の解明(第1報)-比内地鶏とブロイラーの肉質評価-
Source: MDPI journal article supplement (doi:10.3390/ijms232213927), 2011-01-01
Supplement: s1 [file s1]

Data S1 Sequence alignment used for phylogenetic tree construction in nexus file.

#NEXUS

[TITLE: Written by EMBOSS 03/11/21]

begin data;

dimensions ntax=32 nchar=498;

format interleave datatype=protein missing=X gap=-;

matrix

|                    |                                                        |
|--------------------|--------------------------------------------------------|
| Olpidium           | XXXXXXXXXXXXXXXXXXXXXXXXXXXXXXXXXXXXXXXXXXXXKFAKFARETK |
| Catenaria1         | lyqifeyfamfgv---sriaasg-----sdtvlidsarlaklfrdln        |
| Allomyces          | -----mapv                                              |
| Catenaria2         | lrelfeqfasfgt---pranasgpn-----fqqetvmdsarflkffrdqn     |
| Blabri126943       | LHELFESFASFGA---SSSRPSVAA-----ATDGPLIDSARFVKFFRDTG     |
| Chylag1491303      | LEEAFIAFAAFG---SARKPRHGR-----SSGSRISKLAARESG           |
| Clapoll_1869731    | LRSAFEAFASFG---SSRNLAASAP-IP--NAAATTIDSARFAKLARDTG     |
| Chytriomycetes2    | saaafeefssfg---asrhpigspgvpvh-haqqiamdsskfaklcrdsg     |
| Obemuc1859513      | LRTAFEEFALFG---SPRTQAHS---T---TTAPVQMDNAKFAKLCDRSG     |
| Rhizoclostridium2  | lraafeefalfg---tpktiaprphl---pnppiqmdskcfaklcrdsg      |
| Gorhay1188404      | LYESFDAFCQFG---SSRNLA---GSSTN-L--APQMDGAKFAKFCRDNK     |
| Enthell1467718     | LYNCFSSFCQFG---SSRNLS--MGSMTDLA--GPTMDGARWAKFCRDSG     |
| Batrachochytriumd3 | lymtfgsfqfg---ssrnls---gsmdis--gptmdgskwakfcrdtg       |
| Batrachochytriums1 | lytifasfcqyg---ssrnls---gsasdis--gptmdgskwakfcrdsg     |
| Parsed11082034     | LYEVFTQFCAFGAS--RNSNPNLSGSLNNLS-SGPQIDNVRFSKFFRDLK     |
| Glopoll1609812     | LYGVYESFCQFGST--RTSNASLSSSLNNLK--GPTMDGSKWAKFCRDCK     |
| Synchytriumm       | lrvydsfcafg---ssrnlsnsmeslt--gaqldnakfaklskdtg         |
| Synchytriume       | lrdryeafcafg---ssrnлагаatsi-dig--ghqmdnakfakftkdtg     |
| Chytriomycetes1    | lharfekfcafg---rgsvgssldsl-----tagstmdgakwakfardcn     |
| Obemuc1832726      | LRNTFERFCAFG---RGSVGSSLDL-----TGGSTMDGAKWAKFARDSN      |
| Rhizoclostridium1  | LRSTFEKFCAFG---RGSVGSSLDL-----HGGSTMDGPKWAKFARDSN      |
| Chylag1383254      | LHDVFERFAAFG---SNRNLSLDSSLLSISGGGLTLDGPRFAKFARDTG      |
| Clapoll_1821589    | LHDVFERFCSFG---SNRNLASMDASF----GPGLTMDGAKFAKFARDSG     |
| Blyttiomycetes     | XXXXXXXXXXXXXXXXXXXXXXXXXXXXXXXXXXXXXXXXXXXX           |
| Caulochytrium      | lrvvfesyanfg---asrnvas-ngslnnla--gpqldnakfaklcretk     |
| Clarep1_1774182    | LRSVYETFCNASGSSSRMNLASPHSSLDLSGAGLTMDGARFAKFARDCK      |
| Gaesem1531638      | LRDIYEAFCAFG---SNRNLS--TGSLENIA--GPQMDGAKFAKFARDNK     |
| Spizellomyces1     | lreiyeafcafg---ssrnlsnphgsmesia--gptmdgakfakfardnr     |

|                    |                                                      |
|--------------------|------------------------------------------------------|
| Triarc1169044      | LREIYDAFCAFG---SNRNLSNPHGSLESIA--GPTMDGAKFAKFARDNK   |
| Fimjon1566472      | LREIFDAFCAFG---SNRNLATG-----EAG--GNTMDGAKFAKFARDNK   |
| Gervar1417039      | LKEVYVAFCAFG---SNRNLAASS---SDVQ--GPTMDGAKFAKFARDNK   |
| Powellomyces       | lreiyeafcafg---snrnlats----tdvs--gptmdgakfakfardnk   |
|                    |                                                      |
| Olpidium           | LISAPKVTAVDVDNAFMRVK---PRASRKIDFEGFQQALRILAEKRYP-Q   |
| Catenaria1         | lfdk-sfnsialdinfskakatfqrprklpwaafiyalqlsaankypkl    |
| Allomyces          | lrpp-tftttldldlfnkakvhfrrqdrklhydafllyalklsafakfggk  |
| Catenaria2         | lldt-nltptslldhftkakaskrtdrklpwnaflyalqlaattkygsa    |
| Blabril126943      | LLDS-HLTQTTLDIHFAKAKSQFKRADRKLPFADFALYALQLAAVSKYGA   |
| Chylag1491303      | MIGG-NLTVTDVDIVFGRCKV-----GRKLDFKAFKKALEMIAERRGC--   |
| Clapol1_1869731    | LIAPPSLTIVDVLIFEKCKI--AKGTRKLDKFGFKKALQMVAEKRC--     |
| Chytriomycetes2    | lidnetftlidcdivfskckk---vgkrkleyddfralaeiadirqc--    |
| Obemuc1859513      | LVDNISLSLIDVDIIFAKCKQ---VGKRKLFYADFQALREIADTRQC--    |
| Rhizoclosmatium2   | liddislsldvdiifakvkq---pgkrklgyadfqralreiawtrqc--    |
| Gorhay1188404      | LIGG-KVTPTEVDIVFNKVK---GKTARKIDFKEFQEGRLRLAACKYEG-   |
| Enthel1467718      | LLDK-DISATDIDIMFNKVK---AKTARRIDFDQFQAALRLIAAKRFGNS   |
| Batrachochytriumd3 | iidk-hitttdidiwfnkvk---aktvrkidfeqfqaalhlvaakrygss   |
| Batrachochytriums1 | figk-sitatdfdiwfnkvk---aktarkidfdqfqaalhlvaekrygan   |
| Parsed11082034     | VLNK-ELTPTDIDIIFNKVKK--TKTDRKLDKDFCNALVLCSEKKYRPK    |
| Glopol1609812      | VIDK-VITPTEVDIVFNKVK---SKTERKIDYDQFIEGLKMISAKKYS-N   |
| Synchytriumm       | vvdgkkitnadiditfnkvk---akgarkldwesfqdalallaekkyat    |
| Synchytriume       | ivdk-rvtiidvdiifnkvk---akgarkldwetfqdalahlaekky-s    |
| Chytriomycetes1    | lidnkrvtstddiifnkvk---akstridweefqvavklvagkky-pk     |
| Obemuc1832726      | LIDNKKITSTEIDIIFNKVK---AKNSRRIDWEEFQAALKMVAEKKYA-E   |
| Rhizoclosmatium1   | LIDNKKITSTDIDIIFNKVK---SKNSRRIDWDEFCAVKMVAEKKYV-G    |
| Chylag1383254      | LVDGKKVTATDIDIIFNKTK---SKGNRRIDWPVFLEAVQLIAEKRYP-E   |
| Clapol1_1821589    | LIDGRKVTTEIDIIFNKVK---AKTARRIDWNEFVKAVQMLAEKRYP-N    |
| Blyttiomycetes     | XXXXXXXXXXXXXXXXXXXXXXXXXXXXXXXXXXXXXXXXXXXXXXXXXXXX |
| Caulochytrium      | vvdgkrittteidisfskvl---kggrkmdfgqfgevlrllaekkgf-g    |
| Clarep1_1774182    | LIDGKRVTTTDVIDIIFNKA---AKGSRRLDWTTFQAAVRALAQQKYP-E   |
| Gaesem1531638      | IIDGKKVTTTDVIDITFNKVK---PKGARKLDWNTFLDALQLAEKKYA-G   |
| Spizellomyces1     | lidnkrvtttvdvdiifnkvk---tkgarkldwntfidglteiavkky-pg  |
| Triarc1169044      | LIDNKRVTSTDVDITFNKVK---PKGSRKLDWNTFLDGLTDIAEKKNP-G   |
| Fimjon1566472      | LIDNKKVTSTDVDIVFNKVK---PKGARKIDWNGFIEGLTLVAEK-KT-G   |
| Gervar1417039      | LIDNKKVTSTDVDIIFNKVK---PKGARKLDWNTFLEGLTQIAEKKNP-G   |
| Powellomyces       | lidnkkvtstdvdiifnkvk---pkgarkldwntflegltqiaekks-g    |

|                    |                                                |
|--------------------|------------------------------------------------|
| Olpidium           | KDPE-----EAY----LTLVNHVCQSKGPKVHSI---Q-----    |
| Catenaria1         | see-----eafsklvheirhpgpdfapdypgga-----         |
| Allomyces          | pasdpadplaaiaeqailenlvseicatg--ilapvvrtaa----- |
| Catenaria2         | msda-----daleqlineavksq---gpiaratv-----        |
| Blabrie126943      | MSEN-----EALQIIIEACNGS---GPIARGTV-----         |
| Chylag1491303      | -----TIEHVKALVI-GS---EPQLKGTV-----             |
| Clapoll_1869731    | -----DYSHVVAIVV-AG---SPALTGTI-----             |
| Chytriomycetes2    | -----hvshvvamvv-sa---apeingtl-----             |
| Obemuc1859513      | -----DIDHVAMVV-TA---APELNGTI-----              |
| Rhizoclostridium2  | -----deehvvalvv-sa---pvlngti-----              |
| Gorhay1188404      | KNPI-----EQFNAIVRHITSGDN---KPIAYATL-----       |
| Enthel1467718      | KSPT-----EAFAAIIRTIVNGNV---RPVLQGTVRRSAGCGTA   |
| Batrachochytriumd3 | kppt-----eaynllvrsilnsga---rpvatgti-----       |
| Batrachochytriums1 | kspt-----eaymliirditnggt---rpvtiats-----       |
| Parsed11082034     | MDGY-----QAYEKIVTDIVSKDN--AGPLLHGT---R-----    |
| Glopoll1609812     | TTTT-----ESFVILVQFVLSTRG---APVVQTNLKNS-----    |
| Synchytriumm       | lpae-----qafsrldtdilsngs---phlnt--av-----      |
| Synchytriume       | lqpe-----qgfnklvsdvlassg---psltgt--av-----     |
| Chytriomycetes1    | mheq-----daytktiydacilsn---gpvarat---t-----    |
| Obemuc1832726      | KHAQ-----DAFTQVMYDVCVRAH---GPVSKAT---A-----    |
| Rhizoclostridium1  | MHEQ-----DAFTQVMYDVCVRSG---GPAVKAT---A-----    |
| Chylag1383254      | KSDQ-----QALHCTLYDVCIRSP--GGPAKKGT---T-----    |
| Clapoll_1821589    | KRPQ-----DALDSTLYDVCIKAK---GPVSSGT---A-----    |
| Blyttiomycetes     | kkgn-----qafdalikdlrksv---gpvssgt---v-----     |
| Caulochytrium      | avd-----aqqkliaqic-qsk---gpkasgt---t-----      |
| Clarepl_1774182    | RAEM-----EAFNTVMLEVTQARG---PLINKAT---T-----    |
| Gaesem1531638      | KKGR-----EALAVTGDIVKRGS---GPIASGTVRDT-----     |
| Spizellomyces1     | kqgr-----qaldavistimkkgg---gpiatgt---t-----    |
| Triarc1169044      | KKGR-----DALDIVIGTIMKKGG---GPIATGT---T-----    |
| Fimjon1566472      | KQGR-----DALDAVIGLILKKGG---GPIATGT---A-----    |
| Gervar1417039      | KQGR-----DALDSLIGLIIKKGG---GPIATGT---A-----    |
| Powellomyces       | kqgr-----ealdsligliikkgg---gpiatgt---a-----    |
| Olpidium           | -----PEATGIFEKLTDTKL--                         |
| Catenaria1         | -----raqdgaaapvsrasrrs                         |
| Allomyces          | -----adsvapfsaaatap---                         |

|                    |                                                     |
|--------------------|-----------------------------------------------------|
| Catenaria2         | -----pvadgvygkltDasq--                              |
| Blabri126943       | -----TATGGIYSKLTDP TL--                             |
| Chylag1491303      | -----PDMIPIVEKLT DASL--                             |
| Clapol1_1869731    | -----PDYDPVIEKLT DTSL--                             |
| Chytriomyces2      | -----phadelidklt dtsl--                             |
| Obemuc1859513      | -----PQVTELIEKLT DTSL--                             |
| Rhizoclosmatium2   | -----pqvdeiteklt dsvl--                             |
| Gorhay1188404      | -----PANDSITQRLT DTTA--                             |
| Enthell1467718     | RVLTDGCLIVAGSWLLADRGCVLVARGCWMAQAASNDAVTQRMTDHTL--  |
| Batrachochytriumd3 | -----ttsdsvtqr ltdhth--                             |
| Batrachochytriums1 | -----ttndavtqr ltdhtq--                             |
| Parsed11082034     | -----PEASGVYSKLT DHTL--                             |
| Glopol11609812     | -----VQ-MDVTNRLTDPQK--                              |
| Synchytriumm       | -----pknsaivdr ltdtst--                             |
| Synchytriume       | -----sknaaivdr ltdast--                             |
| Chytriomyces1      | -----vkndavldr ltdvsg--                             |
| Obemuc1832726      | -----VQKDAVLDRLT DVNG--                             |
| Rhizoclosmatium1   | -----VKNDAVLDRLT DVNG--                             |
| Chylag1383254      | -----VQADAVLDRLT DTTA--                             |
| Clapol1_1821589    | -----VKNDAVLDRLT DTHA--                             |
| Blyttiomyces       | -----aqtdavldr ltdtqa--                             |
| Caulochytrium      | -----pdakgahnrlt dtsq--                             |
| Clarepl_1774182    | -----AKTDGVYDKLTNTQL--                              |
| Gaesem1531638      | -----PQSDAIVDRLT DTSK--                             |
| Spizellomyces1     | -----pksgdivdr ltdtsk--                             |
| Triarc1169044      | -----PKNDAITDRLT DTSK--                             |
| Fimjon1566472      | -----PKSDAIVDRLT DTSK--                             |
| Gervar1417039      | -----PKSDAIVDRLT DTSK--                             |
| Powellomyces       | -----pkldaivdr ltdtsk--                             |
| Olpidium           | Ytgahkarfdd-ngvgrgaagqvdaedatrnlstivsr dpaskqk-ravs |
| Catenaria1         | stmprtsaes-ndsgigesages-sg-----sfgsgsg--            |
| Allomyces          | cdaprr-----sksthqlhdss-tkiasss-----sk--             |
| Catenaria2         | ytgqhk-----dkpsggsegkg-ytiesplaksr-a-----tgsr--     |
| Blabri126943       | YTGQHK-----DKPTGSSGGAS-REVTIEESRTS-RSKSRSRPGSR--    |
| Chylag1491303      | YTGSHRERFDSVTGVGRGAAGRDT-VAKTGSLSDIVSRHNPNTTLGSPKV  |
| Clapol1_1869731    | YTGTHKNRFPETGVGRGLEGREP-VNTTSNLANLVSRHNPNTLGAFTP    |

|                    |                                                     |
|--------------------|-----------------------------------------------------|
| Chytriomycetes2    | ytgmhrarfdpvtgqgrglagret-isptadlsaivsrhnsattlgskas  |
| Obemuc1859513      | YTGTHKARFDPVTGQGLDGREP-VNPTANLSSIVSRHNTARTLGSKAL    |
| Rhizoclosmatium2   | ytgthkerfdpvtgqgrglagrdr-inttanlstivsrhntartlgskgp  |
| Gorhay1188404      | YTGTHKNRFDE-NGRGLGMQGRDP-K--TISLSNLANREPADIRG-VNFS  |
| Enthell1467718     | YTGTHKNRFDA-SGNGLGMSGRDQ-PSRTNDLAKITNREESNVRG-VPLS  |
| Batrachochytriumd3 | ytgthknrfde-agqglglagrdr-hsrtnelskiivrkeading-vpla  |
| Batrachochytriums1 | ytgthkgrfgs-ngnglgmagrdr-nsktnelskiivrkeanvrg-vsld  |
| Parsed11082034     | YTGSHKERFDE-EGRGKGVSGRNDSSIGVKRLDKLVSRDPAVQNR-AASM  |
| Glopoll1609812     | YTGIHKEKSHG-T----MGSVYDLSDSGRESISTIKTTNG-----       |
| Synchytriumm       | fpvthknrfed-kglgsqgalna-----ksstg-----ttpt          |
| Synchytriume       | fpvthknrfed-hgvlksspgas----reglgksng-----ttpt       |
| Chytriomycetes1    | ytgthknrfds-agrglglngrvt-gkstdtlskiivrndapsqqp-laqt |
| Obemuc1832726      | YTGSHKNRFDS-AGRGLGLQGRDT-ISRTDTLGKIVSRDIAVQRP-SVPQ  |
| Rhizoclosmatium1   | YTGSSKNRFDS-AGRGLGLQGRDT-INRTDTLSKIVNRDAPLQRS-TTVG  |
| Chylag1383254      | YTGTHKSRFDE-NGNGRGLAGRDT-GSKTDRLDKLVSRNDSTT-----    |
| Clapoll_1821589    | YTGTHKLRFDA-DGHGRGMEGRDQ-PSKTDRLDKLVNRDGAGT-----    |
| Blyttiomyces       | ytgthklrfdde-eghglmagrdr-psktndlakianreatslrg-lpvs  |
| Caulochytrium      | ytgthklrfde-egrgrglagrda-paptadlsqildrsgatvrg-vplk  |
| Clarepl_1774182    | YTGAHKLRFDE-QGNGRGMGLKE-RE-----                     |
| Gaesem1531638      | YTGTHKLRFDE-QGHGRGLAGRDR-PAKTDDLSKLVNREPTTVRG-LPVS  |
| Spizellomyces1     | ytgthklrfde-agrgrgaegrdr-psatdqlskitnreetsvrg-lpvs  |
| Triarc1169044      | YTGTHKLRFDE-AGRGRGAAGRDR-ASATDQLSKITNREETSVRG-LPMS  |
| Fimjon1566472      | YTGTHKLRFDD-AGHGRGAAGRDR-PTATADLSQITNREETSVRG-LPVS  |
| Gervar1417039      | YTGTHKLRFDE-AGQGRGAAGRDR-PSPTSLSKITNREETSRLG-LPVS   |
| Powellomyces       | ytgthklrfde-agqgrgaagrdr-psatsdlskitnreetslrg-lpvs  |
| Olpidium           | n-----                                              |
| Catenaria1         | -----slsrsltrsr-----ss                              |
| Allomyces          | -----sasran-----l                                   |
| Catenaria2         | -----snstsnlld-----as                               |
| Blabril26943       | -----SASRSGSVSDLTS-----AL                           |
| Chylag1491303      | M-----                                              |
| Clapoll_1869731    | P-----                                              |
| Chytriomycetes2    | a-----                                              |
| Obemuc1859513      | P-----                                              |
| Rhizoclosmatium2   | l-----                                              |
| Gorhay1188404      | LKPSSSNSSLSNHGSKSNLTTGSKSNLTTGSKSNLTTGSKSNLATKIVQQ  |

|                    |                                                   |
|--------------------|---------------------------------------------------|
| Enthell1467718     | AAYGNSNSNMADGRYSTSSITPSIHNS----S-----N-SSHVGNNGTS |
| Batrachochytriumd3 | aspigsprg----sv-----tmsysp                        |
| Batrachochytriums1 | atdssqskg---yt-----a---at                         |
| Parsed11082034     | NQTN-----                                         |
| Glopoll1609812     | --RRYSN-----FGQET                                 |
| Synchytriumm       | kspggg-----v                                      |
| Synchytriume       | kspat-----v                                       |
| Chytriomycetes1    | nrqsvsnrrqesqst-----mraptaas                      |
| Obemuc1832726      | NSRPIT-----TTEKNRTS                               |
| Rhizoclosmatium1   | GTRRPTTVA-----QADSKQGT                            |
| Chylag1383254      | -----                                             |
| Clapoll1_1821589   | -----                                             |
| Blyttiomycetes     | adpaaga-----ssasrnat                              |
| Caulochytrium      | taertan-----ttata--a                              |
| Clarepl1_1774182   | -----RSN-AG                                       |
| Gaesem1531638      | VDPDAQE-----QS-KP-SS                              |
| Spizellomyces1     | idpeegd-----kqelt-ss                              |
| Triarc1169044      | IDPQEKD-----KT-----                               |
| Fimjon1566472      | IDPQERG-----AS-----                               |
| Gervar1417039      | IDPNEKS-----SP-----                               |
| Powellomyces       | idpnekg-----sp-----                               |
| Olpidium           | -----saealdnkppvk-----kysavrs--snksln             |
| Catenaria1         | sgtsfsaara-----psvp                               |
| Allomyces          | ggaggs-----astrgsqs-nlm                           |
| Catenaria2         | tgtrg-----stgaln-----kstssprgsk-snly              |
| Blabril126943      | AGASISTPRAAAATASFSTLSSTSAGPSA-----TTGHSPRASRTSLAY |
| Chylag1491303      | -----RVATITPPKSPP-----TT-----                     |
| Clapoll1_1869731   | -----KSPAMSRTASTP-----NRSGS-----                  |
| Chytriomycetes2    | -----anralspp-----                                |
| Obemuc1859513      | -----TPHASHPSSPT-----                             |
| Rhizoclosmatium2   | -----spsssfsasapi-----ia-----                     |
| Gorhay1188404      | PKKREHDN---IVTASSETLDKQMAKP-----KR-----           |
| Enthell1467718     | SGKRGHQS---VVTASSERLDLQSSKP-----KKVGSPVKRSTSNLA   |
| Batrachochytriumd3 | kskrahaa---vttmstealdaeanrp-----kkavtsqapr--tvk   |
| Batrachochytriums1 | ipkrthqs---vstvsealdakaskp-----kkglpapiagr--ses   |
| Parsed11082034     | -----K--RGISASMEAMDAQGPTKSIKNLELPNDASLSH--SRSNSG  |

|                    |                                                  |
|--------------------|--------------------------------------------------|
| Glopol11609812     | STKRGF-N--NVVTASTEYLDMNSNKT-----KKQEMYS--SNTQLP  |
| Synchytriumm       | kgspvgnk--rsvtesmdklelaanpp-----ksnkalg--smdnms  |
| Synchytriume       | klgvsgnk--rgvtestekldmsknpv-----ksnknmg--smd-ma  |
| Chytriomyces1      | sisqnkra--svltqseeklenivnap-----kkapvag--rrsqap  |
| Obemuc1832726      | TVASGKRQ--SVLTQSEERLENITNAP-----KKTVPVAG--RRATQ- |
| Rhizoclosmatium1   | VVGSSKRP--SMLTNSEERLENQINAP-----KKTPIAG--RRATT-  |
| Chylag1383254      | -PTIP-----PISARLEIIATTP-----KK-P-----            |
| Clapol1_1821589    | -AASTKRQ--QVLTQSEEQDLAIAQAP-----KK-AIAG--RRAANP  |
| Blyttiomyces       | pgkrshas---vvtasseklldtaskp-----kkadarr--sntnla  |
| Caulochytrium      | gtrrtatq--rtplgsqgslsastppp-----krvtptp--ststrp  |
| Clarep1_1774182    | GQKRQTH---IVTASSERLDLVAHAP-----KRSADSA--SK----   |
| Gaesem1531638      | GSKRGHAS---VVTASSEKLDVNAHKP-----KATKPAE--KTKKA-  |
| Spizellomyces1     | agkrghss---vvtasserldlasskp-----kssklgs--ntnla-  |
| Triarc1169044      | -SKRSHSN---LATASSDRLDQSSSKP-----KSTKKGS--NTNLA-  |
| Fimjon1566472      | -AKRSHSN---LVTASSERLDREASKP-----KNTKVGS--NTNLA-  |
| Gervar1417039      | -AKRGHSS---VVTASSERLDQAASKP-----KAGRIGG--SNSNL-  |
| Powellomyces       | -akrqhsn---vvtasserldnaasqp-----kssklgs--nsnla-  |
| Olpidium           | r----aggsrdrpas-----kseaap-                      |
| Catenaria1         | vpp-----iprsksptrarmslfgaq-----                  |
| Allomyces          | aat-----aasaahattstrsrpasr-----                  |
| Catenaria2         | apt-----tssna----kiagskgs-----                   |
| Blabri126943       | KPT-----ASSTS----RMSLAASG-----                   |
| Chylag1491303      | -----                                            |
| Clapol1_1869731    | -----                                            |
| Chytriomyces2      | -----                                            |
| Obemuc1859513      | -----                                            |
| Rhizoclosmatium2   | -----                                            |
| Gorhay1188404      | -----                                            |
| Enthel1467718      | N-----IKPSEPTP-----                              |
| Batrachochytriumd3 | p-----ivkssetl-----                              |
| Batrachochytriums1 | n-----nklsdptp-----                              |
| Parsed11082034     | A--SSNGLNKSNSNL-----TRSKSSGL-----                |
| Glopol11609812     | KVNFG--SK-----                                   |
| Synchytriumm       | p-----                                           |
| Synchytriume       | s-----                                           |
| Chytriomyces1      | htttkggnytasssl-----assq-----                    |

|                    |                                                    |
|--------------------|----------------------------------------------------|
| Obemuc1832726      | ----QSANYTTSSSL-----ASSQ-----                      |
| Rhizoclosmatium1   | ----HDSSSGNYSTI-----QPKL-----                      |
| Chylag1383254      | TNRSIHGSSTSI-----                                  |
| Clapol1_1821589    | VPSSKFGSSTSIKS-----STP-----                        |
| Blyttiomycetes     | akaattparrpnpslagpaassssttrrsnqdlstpastrasradrapa  |
| Caulochytrium      | aaaktaaaskaaatk-----                               |
| Clarep1_1774182    | --P-----                                           |
| Gaesem1531638      | EPK-----P-Y-----                                   |
| Spizellomyces1     | nkpktpqak-----                                     |
| Triarc1169044      | SKSSPA-----                                        |
| Fimjon1566472      | GKPKTAGG----GNA-----                               |
| Gervar1417039      | NKGSSSNLSKQSSSV-----                               |
| Powellomyces       | g-----kpkpps-----                                  |
| Olpidium           | -----ksagaprsaaasadknvfdrltdpkgyrg                 |
| Catenaria1         | ---psgdaqatpatgarkhqlgsadfvptvpviprgsvfdrltnprgytg |
| Allomyces          | ---tgsrt-nlaagagskhelgsveftptvpsipkgsvfdrltnpskytg |
| Catenaria2         | ---lagrt-kgaagtgshttlgsseyvptqpsipkgsvydrlnpkgyta  |
| Blabrie126943      | ---ATGGS-R-GNLTGSNAKLGSPDYVPTVPSIPKGSVFDRLTNTKGYTG |
| Chylag1491303      | -----PRMQSPRTTNGQSVFDRLSSPTTFTG                    |
| Clapol1_1869731    | -----EGSLGSAPSSPSARPSVFDRLTSVSTFTG                 |
| Chytriomycetes2    | -----phertaasssagpsvfdrlnnvksftg                   |
| Obemuc1859513      | -----SPVRYSEDQGGRESVFDRLNNVSTFTG                   |
| Rhizoclosmatium2   | -----wgenrsmgsedgkpsvfdrlndvstftg                  |
| Gorhay1188404      | -----PEGNSVFDRLTDTAKYTG                            |
| Enthel1467718      | -----LSSLNKRSTSGSMGSSVFERLTDTKAYTG                 |
| Batrachochytriumd3 | -----lntttkktvgas-sgnvfdrlntnkgytg                 |
| Batrachochytriums1 | -----ltasakkaavgs-sgnvydrldtdkgytg                 |
| Parsed11082034     | -----SG-----SSSQLKTTVPQVPAGSVFDRLTDVKKYHG          |
| Glopol1609812      | -----Q-NLTSSNSNLNQNGNVFDRLTNTQGYTG                 |
| Synchytriumm       | -----l-gasksksgsvgsvydrldtdkqytg                   |
| Synchytriume       | -----l-sasksksgsvgsvydrldthksytg                   |
| Chytriomycetes1    | -----qslaks--sttasklsvfdrltdssgytg                 |
| Obemuc1832726      | -----QSLATKNSSVSSSKASVFDRLTNTKDYTG                 |
| Rhizoclosmatium1   | -----LGTT-----QKLIHDIVQGKRI--                      |
| Chylag1383254      | -----ASVGKSTGSSVFDRLTNSNGYTG                       |
| Clapol1_1821589    | -----GSITTLNKSVTGSRTAVFDRLTDTSGYTG                 |



|                    |                                                    |
|--------------------|----------------------------------------------------|
| Blyttiomycetes     | aasttrrsntdlasgarrtvatpaskgtynasgtnssvfdrltttagytg |
| Caulochytrium      | -----tagkay-aasspaggsvfdrltntagytg                 |
| Clarepl_1774182    | -----TTAKTGAQKGGTNVYDRLTNTGAYTG                    |
| Gaesem1531638      | -----TAVTKTSCGQSSKGGSVFDRLTDSSGYTG                 |
| Spizellomyces1     | -----idksyg--anakggsvfdrltnsgqytg                  |
| Triarc1169044      | -----AKSEE--YTAKGGSVFDRLTDSNQYTG                   |
| Fimjon1566472      | -----AAASSYGAS-SSKGGSVFDRLTDSSGYTG                 |
| Gervar1417039      | -----EAKQSYGTANAKAGGSVFDRLTDTTGYTG                 |
| Powellomyces       | -----asaqsygtnnpkaggsvfdrltdssgytg                 |
| Olpidium           | thaqrfd-qgkgrglagrdstskga-gpgayhggdvkdisqilrs--    |
| Catenaria1         | thkerfda-dgrgkgkagrvetesvq-----mtlsemvkrf-         |
| Allomyces          | thkerfdpatgkgrglagrsqenlgt-----kpldklvhrs-         |
| Catenaria2         | thkerfdd-qgkgkgkagrvgddlgt-----kslehlvark-         |
| Blabri126943       | SHRERFDE-DGRGRGKAGRVQENVGT-----QSLEKLVSRLN-        |
| Chylag1491303      | THKHRFNP-DGTGRGLEGRTGEGAGE-----TVNSLSQITRK--       |
| Clapol1_1869731    | SHKHRFNA-DGTGRGKEGRVGDGAGD-----VVSDLSQITRR--       |
| Chytriomycetes2    | thkhrrfns-dgtgrgkagrd-----                         |
| Obemuc1859513      | THKHRFNE-DGTGRGKAGRED-----                         |
| Rhizoclostridium2  | thkhrrfnp-dgtgrgkegrdpssta-----d---lsqivsark       |
| Gorhay1188404      | THKERFNA-DGSGRGIAGRDTVGPY----LYRT---GSSSSITRA--    |
| Enthel1467718      | THKHRFND-DGSGRGIDGRDPNAGTS----GKT-----LASILRT--    |
| Batrachochytriumd3 | thkerfhg-ssn--sihg-----                            |
| Batrachochytriums1 | tqkerfgg-sks--sirg-----                            |
| Parsed11082034     | THKHRFNE-DGSGKGKAGRVQDVGP-----KKLESFLRN--          |
| Glopoll1609812     | THKQRFDE-HGNRGLEGREAIKSGTQSIYRGGNVNSLSQILRS--      |
| Synchytriumm       | thklrfnd-dgtgrgiagrdspskgg-vgpvrddgqnvndlsqilrr--  |
| Synchytriume       | thklrfnd-dgsgrgiagrdspskgg-tgvvrddgqnvndlsqilrr--  |
| Chytriomycetes1    | thqhrfna-dgsgrglagrdsaplgkggvtqyrngnvnsqilrs--     |
| Obemuc1832726      | AHKHRFNA-DGTGRGLAGRDSAPLGSGGESKYRGGDVKDLKQILRT--   |
| Rhizoclostridium1  | -----                                              |
| Chylag1383254      | THKLRFNA-SGTGRGLAGRDSIPK-N-GVGVRGGDVKELSQILRPGF    |
| Clapol1_1821589    | SHKHRFNA-DGTGRGAAGREIVSKGH-SVGTYRGGDVKDLSQILRN--   |
| Blyttiomycetes     | thklrfna-dgtgrgmagrdapakga-apgayrggdvkdlsqilrs--   |
| Caulochytrium      | shkerfna-dgtgrglagreapnksq-apgyrngnvdsqilrt--      |
| Clarepl_1774182    | THKLRFDA-SGQGRGLAGRDSAPKGQ-SAGQYRGGDVKDLSQILRN--   |
| Gaesem1531638      | SHKERFNS-DGTGRGLSGRDSPSKSG-AAGKYRGGDVKDLSQILRS--   |

```

Spizellomyces1      thkhrfna-dgsgrgiagrdspakgt-spgsyrggdvkdlsqilrs--
Triarc1169044      AHKHRFNA-DGSGKGIVGRDSPSKGG-GPGTYRGGDVKDLSQILRS--
Fimjon1566472      AHKQRFNA-DGTGKGLAGRDSPAKGG-APGKYRGGDVKDLAQILRS--
Gervar1417039      AHKQRFNA-DGTGRGIAGRDAPAKGG-SPGKYRGGDVKDLSQILRN--
Powellomyces       ahkqrfna-dgtgkglagrdapakgn-spgkyrggdvkdlsqilrn--

```

```
;
```

```
end;
```

```
begin assumptions;
```

```
options deftype=unord;
```

```
end;
```

---

```
Phylogenetic tree in con file.
```

```
#NEXUS
```

```
[ID: 1928394251]
```

```
begin trees;
```

```

[Note: This tree contains information on the topology,
      branch lengths (if present), and the probability
      of the partition indicated by the branch.]

```

```

tree con_50_majrule =
(Olpidium:0.491849,((Catenaria1:0.636440,(Allomyces:0.616783,(Catenaria2:0.319621,B
labri126943:0.297141):0.71:0.075056):0.51:0.099658):1.00:0.365325,Parsed11082034:0.420
645):1.00:0.220331,(Chylag1491303:0.463140,Clapol1_1869731:0.209358):1.00:0.160893,(
Chytriomycetes2:0.229313,(Obemuc1859513:0.133213,Rhizoclosmatium2:0.249109):1.00:0.121
602):1.00:0.153875):1.00:0.363354,((((Gorhay1188404:0.370528,(Enthel1467718:0.231303
,(Batrachochytriumd3:0.244778,Batrachochytriums1:0.211146):1.00:0.155674):1.00:0.1571
77):0.54:0.072211,Glopoll1609812:0.609138):0.98:0.136199,((((Chytriomycetes1:0.207280,(
Obemuc1832726:0.090743,Rhizoclosmatium1:0.303189):1.00:0.088831):1.00:0.252477,Clapol
1_1821589:0.190135):0.62:0.074434,Chylag1383254:0.286597):1.00:0.172461,Clarep1_17741
82:0.369318):1.00:0.138789,Blyttiomycetes:0.287482,(Gaesem1531638:0.161047,((Spizellom
ycetes1:0.101310,Triarc1169044:0.100769):1.00:0.080855,(Fimjon1566472:0.130326,(Gervar
1417039:0.118654,Powellomyces:0.041193):1.00:0.067198):0.99:0.040848):1.00:0.129354):1.
00:0.127557):0.70:0.072532):0.54:0.066087,(Synchytriumm:0.183318,Synchytriume:0.18148
6):1.00:0.459595):0.73:0.070564,Caulochytrium:0.447358):0.77:0.088088);

```

```

[Note: This tree contains information only on the topology
      and branch lengths (mean of the posterior probability density).]

```

```

tree con_50_majrule =
(Olpidium:0.491849,((Catenaria1:0.636440,(Allomyces:0.616783,(Catenaria2:0.319621,B
labri126943:0.297141):0.075056):0.099658):0.365325,Parsed11082034:0.420645):0.22033
1,((Chylag1491303:0.463140,Clapol1_1869731:0.209358):0.160893,(Chytriomycetes2:0.2293
13,(Obemuc1859513:0.133213,Rhizoclosmatium2:0.249109):0.121602):0.153875):0.363354,
((((Gorhay1188404:0.370528,(Enthel1467718:0.231303,(Batrachochytriumd3:0.244778,Ba
trachochytriums1:0.211146):0.155674):0.157177):0.072211,Glopoll1609812:0.609138):0.1
36199,((((Chytriomycetes1:0.207280,(Obemuc1832726:0.090743,Rhizoclosmatium1:0.303189
):0.088831):0.252477,Clapol1_1821589:0.190135):0.074434,Chylag1383254:0.286597):0.1

```

72461,Clarep1\_1774182:0.369318):0.138789,Blyttomyces:0.287482,(Gaesem1531638:0.161  
047,((Spizellomyces1:0.101310,Triarc1169044:0.100769):0.080855,(Fimjon1566472:0.130  
326,(Gervar1417039:0.118654,Powellomyces:0.041193):0.067198):0.040848):0.129354):0.  
127557):0.072532):0.066087,(Synchytriumm:0.183318,Synchytriume:0.181486):0.459595):  
0.070564,Caulochytrium:0.447358):0.088088);

end;
